# Supplementary material for: Highly selective separation of dyes using compressed CO2 and spherical polyelectrolyte brushes
Source: Royal Society of Chemistry journal article supplement (doi:10.1039/c5ra25876f), 2016-01-01
Supplement: c5ra25876f1.pdf [file c5ra25876f1.pdf]

## Highly Selective Separation of Dyes by Using Compressed CO<sub>2</sub> and Spherical Polyelectrolyte Brushes

Rui Zhang<sup>\*a</sup>, Zhenchuan Yu<sup>a</sup>, Yu Cang<sup>a</sup>, Xiaoyan Hou<sup>a</sup>, Zheqi Shen<sup>a</sup>, Jie Deng<sup>a</sup>, Zhiming Zhou<sup>a</sup>, Xuhong

Guo<sup>a</sup>, Junwei Wang<sup>b</sup>, Xuedong Zhu<sup>\*ab</sup>

a State Key Laboratory of Chemical Engineering, East China University of Science and Technology, 130 Meilong Road, Shanghai 200237, China.

b Collaborative Innovation Center for Petrochemical New Materials, Anqing, Anhui 246011, China

E-mail: r.zhang@ecust.edu.cn, xdzhu@ecust.edu.cn

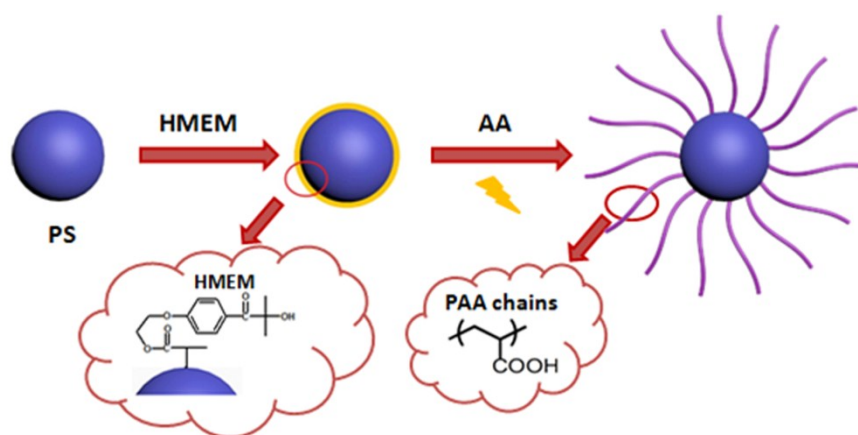

Scheme S1. Synthesis process of PS-PAA.

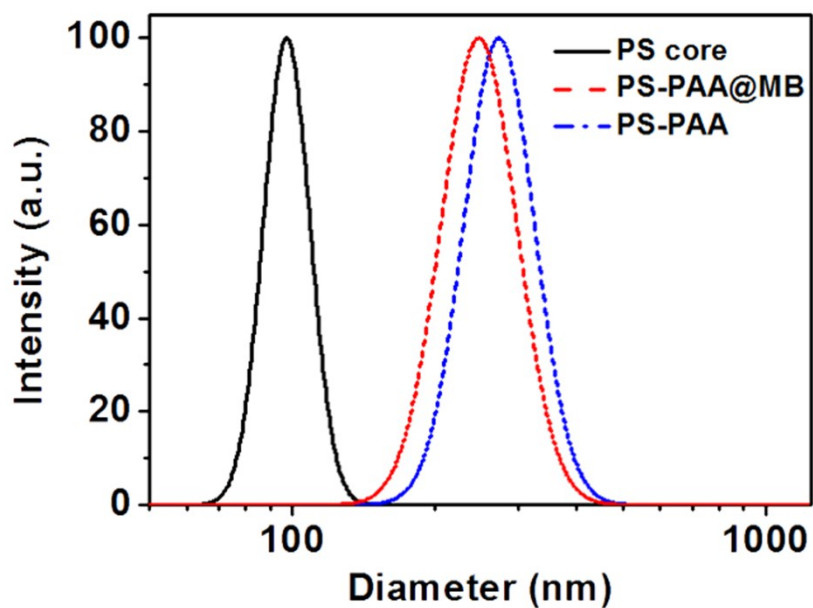

Fig. S1 Diameter of PS core, SPBs and SPBs-MB determined by DLS. Condition: PS core concentration: 200mg/L; PS-PAA concentration: 200mg/L; MB concentration: 3.75mg/L; temperature: 25 °C; stirring time: 1h.

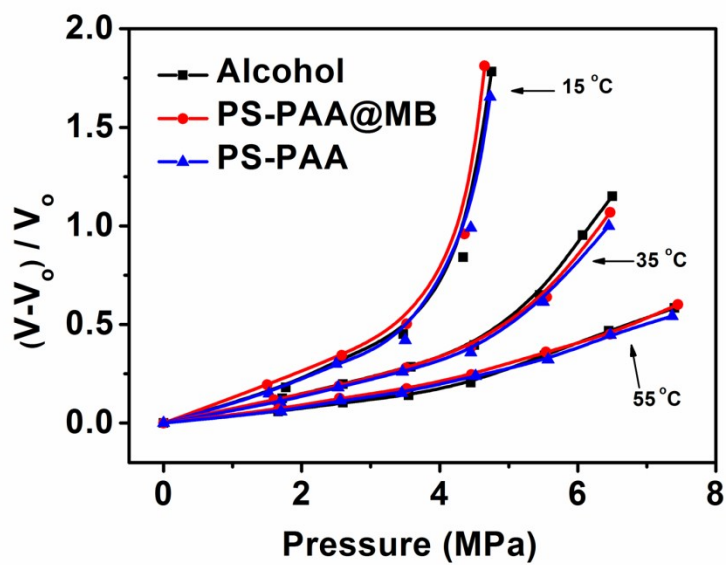

Fig. S2 Dependence of  $\Delta V$  of different solutions on  $\text{CO}_2$  pressure at different temperatures. Condition: PS-PAA concentration: 200mg/L; MB concentration: 3.75mg/L; stirring time: 1h.

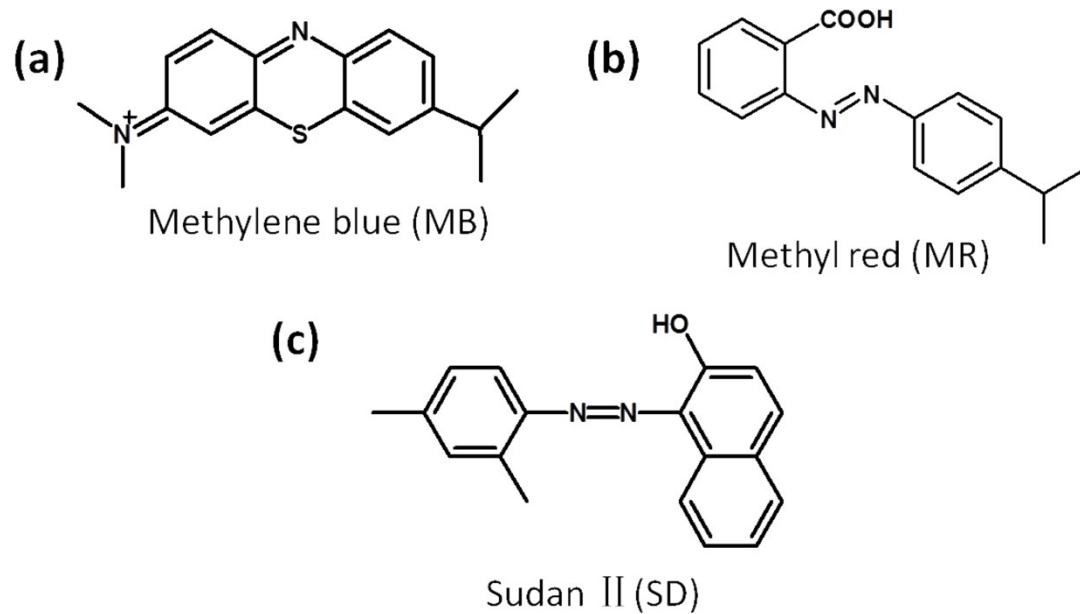

Fig. S3 Chemical structures of cationic dyes (a) methylene blue, anionic dyes (b) methyl red, and neutral dye (c) sudan II.
